# Supplementary material for: Causes and Consequences of COVID-19-Associated Bacterial Infections
Source: PubMed Central journal article supplement (PMC8329088; doi:10.3389/fmicb.2021.682571), 2021-07-20
Supplement: Image_1.pdf [file Image_1.pdf]

## **SUPPLEMENT: simulation model of causal pathways**

In the main text results, we set the model tuning parameters  $a$ ,  $b$ , and  $c$  to 1. Here we vary these parameters and examine model consistency with Zhou et al. (2020) data (Figure S1).

We simulate cohorts of 1000 hospitalized COVID-19 positive cases under a range of  $a, b, c$  scenarios, obtaining distributions for four possible outcomes: survivors with bacterial infection, survivors without bacterial infection, non-survivors with bacterial infection, and non-survivors without. We compare our modeled distributions to data from the Zhou et al study. Combinations of parameter values that were consistent with the data (within a 95% CI) are coded as green dots (Figure S1).

This model fitting shows that no parameter other than  $b$  can equal zero. This confirms our ruling out of the pipe structure (where  $a = 0$ ) and allows us to rule out the fork structure (where  $c = 0$ ) as very unlikely to be the true causal structure. Together, our models support both a collider or multi-path causal structure underpinning bacterial-associated mortality in COVID-19.

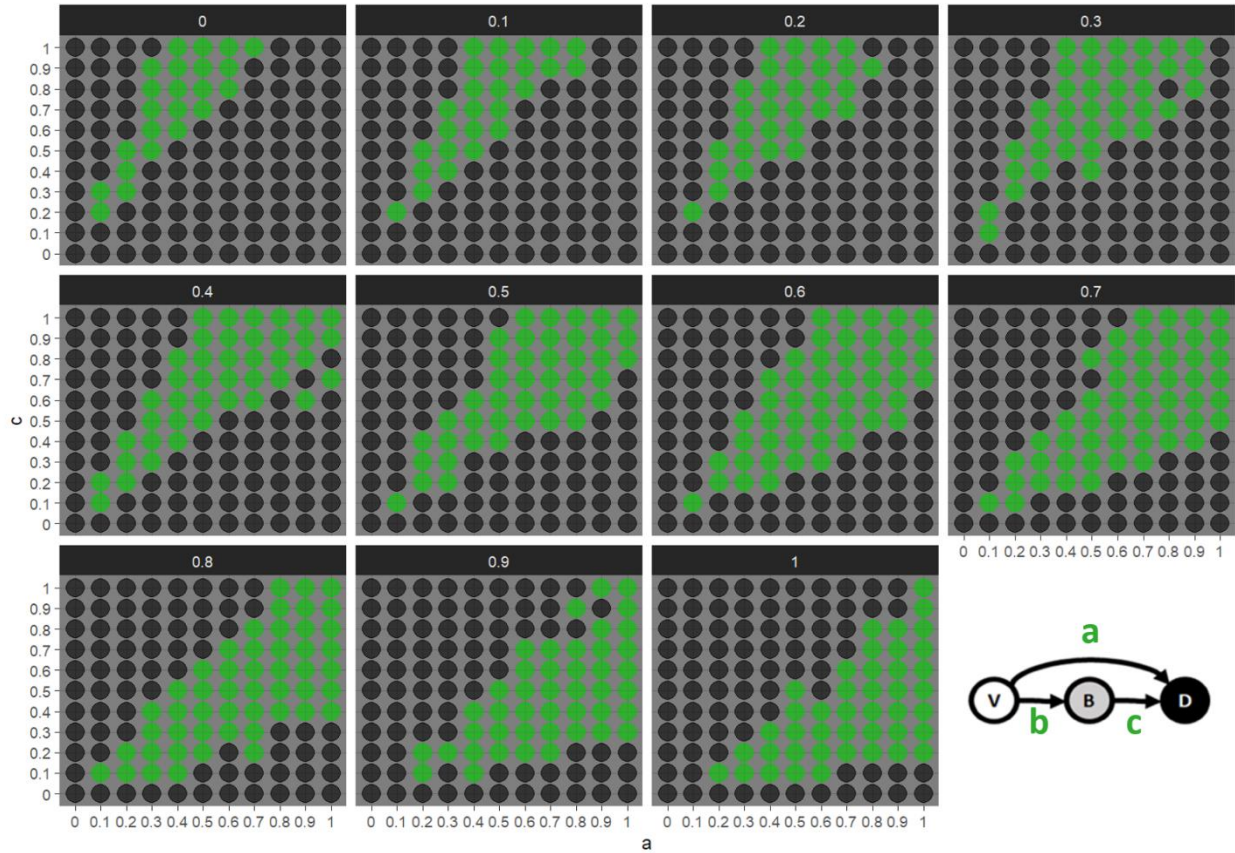

**Figure S1. Fitting the general model.** We fit a general model by introducing parameters  $a$ ,  $b$ , and  $c$  to modulate the effect of  $(V \rightarrow D)$ ,  $(V \rightarrow B)$ , and  $(B \rightarrow D)$ , respectively. For each combination of parameters  $a$ ,  $b$ , and  $c$ , we run 100 simulations of cohorts of 1000 hospitalized patients each. For each cohort, obtaining distributions of the percentage of patients for each of four possible outcomes: survivors with bacterial infection, survivors without bacterial infection, non-survivors with bacterial infection, and non-survivors without. We then compare the observed percent distribution from the *Zhou et al* study to the simulated ones, and highlight where the observed percentage for each outcome falls within a 90% CI for the simulated distributions (green circles). Our model fitting shows that only  $b$  can equal zero and still be consistent with the observed infection and mortality data.
